# Supplementary material for: Metabolism disturbance by light/dark cycle switching depends on the rat health status: the role of grape seed flavanols
Source: Royal Society of Chemistry journal article supplement (doi:10.1039/d3fo00260h), 2023-01-01
Supplement: d3fo00260h1.pdf [file d3fo00260h1.pdf]

*Table S1. Nucleotide sequences of primers used for PCR amplification in hypothalamus.*

| <b>Gene</b>  | <b>Forward primer (5' to 3')</b> | <b>Reverse primer (5' to 3')</b> |
|--------------|----------------------------------|----------------------------------|
| <i>Bmal1</i> | GTAGATCAGAGGGCGACGGCTA           | CTTGTCTGTAAAACCTGCCTGTGAC        |
| <i>Cry1</i>  | TGGAAGGTATGCGTGCCTC              | TCCAGGAGAACCTCCTCACG             |
| <i>Per2</i>  | CGGACCTGGCTTCAGTTCAT             | AGGATCCAAGAACGGCACAG             |
| <i>Nampt</i> | CTCTTCACAAGAGACTGCCG             | TTCATGGTCTTTCCCCCAG              |
| <i>Ppia</i>  | CTTCGAGCTGTTTGCAGACAA            | AAGTCACCACCCTGGCACATG            |

*Bmal1*, hydrocarbon receptor nuclear translocator-like 1; *Cry1*, cryptochrome 1; *Nampt*, Nicotinamide Phosphoribosyltransferase; *Per2*, period 2; *Ppia*, Peptidylprolyl Isomerase A.

Table S2. Serum metabolites (Arbitrary units).

|                            | L18-STD-VH (n=6)       | L18-STD-GSPE (n=6)     | L18-CAF-VH (n=6)         | L18-CAF-GSPE (n=6)      | L18     | L6-STD-VH (n=6)        | L6-STD-GSPE (n=6)      | L6-CAF-VH (n=6)            | L6-CAF-GSPE (n=6)       | L6      | CAF vs STD |
|----------------------------|------------------------|------------------------|--------------------------|-------------------------|---------|------------------------|------------------------|----------------------------|-------------------------|---------|------------|
| METABOLITES                | MEDIAN (IQR)           | MEDIAN (IQR)           | MEDIAN (IQR)             | MEDIAN (IQR)            | P-VALUE | MEDIAN (IQR)           | MEDIAN (IQR)           | MEDIAN (IQR)               | MEDIAN (IQR)            | P-VALUE | P-VALUE    |
| 2-HydroxyButyric acid      | 1.116 (0.874-1.217)    | 1.306 (0.999-1.709)    | 1.961 (1.372-2.155)      | 2.416 (2.008-3.351)     | 0.095   | 1.459 (0.895-3.036)    | 1.67 (1.325-1.999)     | 1.405 (0.952-1.737)        | 1.41 (1.077-2.749)      | 0.593   | 0.584      |
| 2-Hydroxyisobutyric acid   | 2.11 (2.001-2.297)     | 1.944 (1.798-2.547)    | 3.399 (2.997-4.409)aa    | 3.603 (3.443-3.711)aa   | 0.009   | 2.428 (2.165-3.148)    | 2.214 (2.084-2.288)    | 3.333 (3.03-4.083)         | 3.359 (2.955-3.489)     | 0.058   | 0.596      |
| 2-Hydroxyisovaleric acid   | 0.56 (0.503-0.596)     | 0.485 (0.411-0.635)    | 0.6 (0.445-0.687)        | 0.531 (0.481-0.572)     | 0.661   | 0.638 (0.534-0.734)    | 0.555 (0.425-0.673)    | 0.472 (0.443-0.519)        | 0.534 (0.474-0.572)     | 0.081   | 0.077      |
| 3-hydroxybutyric acid      | 13.207 (10.9-14.59)    | 14.365 (10.708-21.853) | 15.972 (9.802-19.917)    | 14.222 (11.414-18.044)  | 0.391   | 20.158 (13.675-32.971) | 17.76 (14.127-24.17)   | 10.173 (9.019-14.099)      | 10.415 (8.886-13.833)   | 0.547   | 0.829      |
| 3-Hydroxyisovaleric acid   | 0.465 (0.428-0.511)    | 0.47 (0.45-0.571)      | 0.46 (0.4-0.583)         | 0.493 (0.424-0.531)     | 0.985   | 0.552 (0.453-0.669)    | 0.477 (0.463-0.515)    | 0.434 (0.4-0.504)          | 0.438 (0.417-0.509)     | 0.08    | 0.255      |
| 3-Phosphoglyceric acid     | 0.034 (0.029-0.038)    | 0.029 (0.022-0.034)    | 0.048 (0.039-0.056)      | 0.048 (0.041-0.054)     | 0.064   | 0.035 (0.03-0.043)     | 0.035 (0.032-0.04)     | 0.034 (0.032-0.041)x       | 0.031 (0.028-0.038)     | 0.202   | 0.045      |
| 4-Hydroxybenzoic acid      | 0.104 (0.1-0.106)      | 0.104 (0.102-0.105)    | 0.103 (0.099-0.105)      | 0.105 (0.102-0.106)     | 0.419   | 0.103 (0.102-0.104)    | 0.104 (0.103-0.106)    | 0.102 (0.1-0.104)          | 0.102 (0.097-0.106)     | 0.774   | 0.857      |
| 4-hydroxyPhenyllactic acid | 18.936 (14.946-36.319) | 17.479 (12.284-25.008) | 7.505 (2.901-9.057)aa    | 11.815 (9.026-13.967)€b | 0.014   | 19.824 (3.534-28.675)  | 16.385 (13.276-17.492) | 6.932 (4.908-7.705)        | 8.371 (7.355-10.211)€aa | 0.042   | 0.105      |
| 4-Hydroxyproline           | 3.488 (2.458-3.729)    | 2.941 (2.475-4.022)    | 3.594 (2.819-4.926)      | 3.422 (2.921-4.478)     | 0.5     | 2.287 (2.167-2.533)+   | 2.435 (1.982-2.967)    | 2.982 (2.396-3.393)        | 2.485 (2.013-3.154)     | 0.769   | 0.027      |
| Aconitic acid              | 0.051 (0.041-0.084)    | 0.054 (0.033-0.117)    | 0.154 (0.073-0.317)      | 0.074 (0.06-0.093)      | 0.373   | 0.052 (0.024-0.07)     | 0.034 (0.027-0.053)    | 0.087 (0.073-0.406)b       | 0.055 (0.042-0.074)€b   | 0.018   | 0.069      |
| Alanine                    | 16.385 (15.152-16.919) | 16.884 (15.81-18.24)   | 17.821 (17.167-19.033)aa | 16.571 (16.013-16.973)€ | 0.028   | 15.962 (14.955-17.133) | 15.406 (14.533-16.171) | 17.458 (16.541-20.436)b    | 17.19 (16.717-17.739)aa | 0.004   | 0.006      |
| alpha-ketoglutaric acid    | 2.25 (1.712-3.723)     | 1.951 (1.398-3.112)    | 2.27 (1.968-2.606)       | 2.405 (1.909-2.728)     | 0.718   | 2.359 (2.009-3.611)    | 2.512 (1.99-3.202)     | 1.825 (1.548-2.259)        | 1.706 (1.49-1.966)      | 0.492   | 0.745      |
| alpha-tocopherol           | 0.043 (0.039-0.049)    | 0.039 (0.032-0.041)c   | 0.066 (0.053-0.068)a     | 0.056 (0.05-0.069)aa    | 0.001   | 0.029 (0.022-0.05)     | 0.034 (0.026-0.054)    | 0.074 (0.07-0.077)++       | 0.06 (0.052-0.07)       | 0.075   | 0.009      |
| Aspartic                   | 0.299 (0.223-0.418)    | 0.345 (0.283-0.384)    | 0.358 (0.281-0.407)      | 0.336 (0.325-0.347)     | 0.409   | 0.32 (0.278-0.43)      | 0.324 (0.284-0.389)    | 0.324 (0.285-0.363)        | 0.304 (0.299-0.347)     | 0.87    | 0.813      |
| Cholesterol                | 11.455 (10.478-13.187) | 9.564 (7.463-11.011)   | 12.476 (10.583-14.344)   | 11.793 (9.404-13.462)   | 0.101   | 10.482 (8.536-11.839)  | 9.569 (8.64-11.989)    | 13.437 (12.207-13.867)     | 12.14 (10.304-13.65)    | 0.188   | 0.373      |
| Citric acid                | 32.587 (29.07-45.991)  | 32.052 (27.445-38.804) | 36.627 (34-37.803)       | 32.683 (26.449-39.745)  | 0.52    | 37.319 (33.509-54.107) | 35.811 (29.775-42.316) | 25.074 (23.913-26.639)aa++ | 25.822 (22.242-28.263)a | 0.003   | 0.016      |
| d-Fructose                 | 0.054 (0.043-0.075)    | 0.053 (0.036-0.065)    | 0.083 (0.059-0.109)aa    | 0.108 (0.095-0.132)aa   | 0.007   | 0.05 (0.035-0.074)     | 0.052 (0.047-0.077)    | 0.071 (0.053-0.096)        | 0.099 (0.09-0.115)caa   | 0.015   | 0.47       |
| DL-2-Hydroxyglutaric acid  | 0.154 (0.127-0.224)    | 0.151 (0.134-0.187)    | 0.147 (0.129-0.165)      | 0.135 (0.127-0.164)     | 0.381   | 0.167 (0.15-0.199)     | 0.159 (0.145-0.169)    | 0.121 (0.108-0.136)a++     | 0.122 (0.116-0.139)a    | 0.003   | 0.02       |
| d-Mannitol                 | 0.068 (0.014-0.075)    | 0.051 (0.045-0.067)    | 0.015 (0.008-0.046)      | 0.011 (0.006-0.018)     | 0.059   | 0.037 (0.016-0.057)    | 0.036 (0.02-0.049)     | 0.01 (0.007-0.02)a         | 0.006 (0.005-0.014)ca   | 0.005   | 0.222      |
| d-Mannonic acid            | 0.03 (0.024-0.038)     | 0.029 (0.026-0.035)    | 0.037 (0.035-0.045)      | 0.033 (0.028-0.036)     | 0.117   | 0.03 (0.025-0.035)     | 0.025 (0.023-0.029)    | 0.034 (0.027-0.039)        | 0.033 (0.03-0.037)      | 0.216   | 0.087      |
| Dodecanoic acid            | 0.235 (0.219-0.272)    | 0.228 (0.222-0.269)    | 0.307 (0.245-0.455)      | 0.388 (0.295-0.461)     | 0.114   | 0.256 (0.226-0.28)     | 0.244 (0.213-0.296)    | 0.276 (0.253-0.306)        | 0.324 (0.295-0.369)ca   | 0.028   | 0.612      |
| d-Sucrose                  | 0.028 (0.013-0.059)    | 0.012 (0.007-0.025)    | 0.345 (0.152-            | 0.201 (0.12-0.332)aa    | 0.008   | 0.014 (0.006-0.036)    | 0.037 (0.015-0.349)    | 0.055 (0.051-              | 0.116 (0.053-0.181)     | 0.042   | 0.041      |

|                                   |                        |                        |                        |                        |       |                         |                        |                        |                        |       |       |  |
|-----------------------------------|------------------------|------------------------|------------------------|------------------------|-------|-------------------------|------------------------|------------------------|------------------------|-------|-------|--|
|                                   |                        |                        | 0.477)aa               |                        |       |                         |                        | 0.064)aa++             |                        |       |       |  |
| <i>d-Threitol</i>                 | 0.028 (0.025-0.03)     | 0.027 (0.024-0.029)    | 0.029 (0.025-0.036)    | 0.031 (0.03-0.035)     | 0.113 | 0.023 (0.022-0.026)     | 0.025 (0.023-0.026)    | 0.027 (0.025-0.029)    | 0.028 (0.026-0.031)    | 0.414 | 0.507 |  |
| <i>Ethanolamine</i>               | 0.496 (0.472-0.564)    | 0.555 (0.463-0.608)    | 0.525 (0.48-0.729)     | 0.513 (0.44-0.56)      | 0.456 | 0.55 (0.395-0.579)      | 0.587 (0.455-0.628)    | 0.543 (0.508-0.58)     | 0.547 (0.407-0.584)    | 0.455 | 0.625 |  |
| <i>Fructose-6-phosphate</i>       | 0.081 (0.068-0.272)    | 0.101 (0.048-0.142)    | 0.061 (0.041-0.086)    | 0.054 (0.038-0.066)    | 0.611 | 0.095 (0.057-0.193)     | 0.092 (0.071-0.109)    | 0.061 (0.054-0.112)    | 0.054 (0.047-0.061)    | 0.061 | 0.555 |  |
| <i>Fumaric acid</i>               | 1.04 (0.634-1.458)     | 0.775 (0.567-1.233)    | 0.846 (0.729-1.046)    | 0.816 (0.649-1.127)    | 0.72  | 0.995 (0.8-1.447)       | 0.902 (0.695-1.12)     | 0.622 (0.568-0.827)+   | 0.641 (0.572-0.759)    | 0.191 | 0.196 |  |
| <i>Galacturonic acid</i>          | 0.013 (0.011-0.016)    | 0.011 (0.01-0.017)     | 0.018 (0.018-0.021)a   | 0.021 (0.015-0.025)a   | 0.032 | 0.012 (0.011-0.013)     | 0.012 (0.01-0.014)     | 0.019 (0.016-0.022)aa  | 0.02 (0.017-0.025)aa   | 0.017 | 0.282 |  |
| <i>Glucose</i>                    | 39.681 (36.993-41.692) | 35.717 (33.906-37.901) | 37.453 (32.53-37.92)   | 38.204 (36.749-39.582) | 0.191 | 37.57 (34.76-42.263)    | 38.532 (35.612-41.266) | 37.556 (34.842-40.092) | 38.59 (36.543-40.286)  | 0.917 | 0.384 |  |
| <i>Glucose 6-phosphate</i>        | 0.039 (0.036-0.082)    | 0.035 (0.024-0.06)     | 0.033 (0.023-0.038)b   | 0.025 (0.016-0.034)    | 0.023 | 0.046 (0.027-0.057)     | 0.038 (0.036-0.052)    | 0.03 (0.025-0.052)     | 0.027 (0.023-0.03)     | 0.057 | 0.09  |  |
| <i>Glutamic acid</i>              | 6.613 (5.409-7.89)     | 6.696 (6.167-7.395)    | 7.523 (6.872-8.062)    | 7.051 (6.287-7.789)    | 0.833 | 7.32 (6.546-8.254)      | 7.156 (6.54-9.266)     | 6.691 (6.38-6.957)     | 6.355 (5.656-7.387)    | 0.529 | 0.577 |  |
| <i>Glutamine</i>                  | 0.534 (0.433-0.855)    | 0.587 (0.457-1.663)    | 1.405 (0.747-3.522)    | 0.683 (0.55-0.909)     | 0.061 | 0.428 (0.27-1.203)      | 0.424 (0.294-0.492)    | 0.9 (0.727-6.487)b     | 0.654 (0.427-0.726)€b  | 0.003 | 0.004 |  |
| <i>Glyceraldehyde-3-phosphate</i> | 0.005 (0.003-0.005)    | 0.005 (0.004-0.007)    | 0.004 (0.004-0.005)    | 0.004 (0.004-0.004)    | 0.086 | 0.006 (0.005-0.006)     | 0.005 (0.005-0.006)    | 0.004 (0.003-0.004)aa  | 0.004 (0.004-0.004)aa  | 0.007 | 0.083 |  |
| <i>Glyceric acid</i>              | 1.265 (0.794-1.849)    | 1.371 (0.76-1.521)     | 0.955 (0.861-1.054)    | 0.795 (0.714-1.368)    | 0.348 | 1.303 (0.624-2.434)     | 0.915 (0.649-1.547)    | 0.902 (0.746-1.46)     | 1.237 (0.939-1.47)     | 0.473 | 0.577 |  |
| <i>Glycerol</i>                   | 0.671 (0.536-0.965)    | 0.861 (0.544-1.062)    | 1.106 (0.857-1.477)a   | 1.225 (1.132-1.562)a   | 0.001 | 0.834 (0.706-0.887)     | 0.954 (0.768-1.01)     | 1.118 (0.88-1.235)a    | 1.227 (1.088-1.414)aa  | 0.008 | 0.004 |  |
| <i>Glycerol-1-phosphate</i>       | 0.201 (0.165-0.275)    | 0.188 (0.154-0.221)    | 0.211 (0.165-0.266)    | 0.183 (0.147-0.199)    | 0.284 | 0.213 (0.162-0.275)     | 0.167 (0.143-0.258)    | 0.21 (0.183-0.278)     | 0.165 (0.144-0.214)    | 0.142 | 0.951 |  |
| <i>Glycine</i>                    | 4.903 (4.716-5.021)    | 4.961 (4.726-5.151)    | 4.657 (4.276-4.934)    | 4.366 (4.133-4.547)    | 0.052 | 4.845 (4.725-5.139)     | 4.692 (4.611-4.801)    | 4.733 (4.685-5.176)    | 4.58 (4.297-4.933)     | 0.724 | 0.988 |  |
| <i>Glycolic acid</i>              | 0.097 (0.094-0.114)    | 0.109 (0.097-0.133)    | 0.135 (0.121-0.148)aa  | 0.116 (0.113-0.136)c   | 0.027 | 0.12 (0.097-0.146)      | 0.117 (0.109-0.125)    | 0.12 (0.115-0.134)     | 0.133 (0.127-0.137)    | 0.634 | 0.034 |  |
| <i>Heptanoic</i>                  | 0.434 (0.406-0.49)     | 0.411 (0.395-0.464)    | 0.427 (0.382-0.465)    | 0.441 (0.402-0.539)    | 0.405 | 0.483 (0.4-0.5)         | 0.452 (0.432-0.468)    | 0.408 (0.376-0.447)    | 0.45 (0.434-0.492)     | 0.392 | 0.79  |  |
| <i>Hippuric acid</i>              | 0.342 (0.234-0.544)    | 0.631 (0.531-0.726)€   | 0.145 (0.121-0.287)a   | 0.106 (0.053-0.21)aa   | 0.001 | 0.451 (0.312-0.559)     | 0.482 (0.407-0.585)    | 0.107 (0.076-0.154)aax | 0.077 (0.056-0.146)aa  | 0.004 | 0.006 |  |
| <i>Indole-3-propanoic acid</i>    | 1.343 (0.97-1.683)     | 1.528 (0.955-1.645)    | 1.088 (0.812-3.042)    | 0.911 (0.562-1.414)    | 0.701 | 1.101 (0.572-1.539)     | 0.953 (0.774-1.192)    | 0.861 (0.545-1.047)    | 0.6 (0.374-0.934)      | 0.176 | 0.602 |  |
| <i>Isoleucine</i>                 | 4.477 (4.07-5.107)     | 4.47 (4.009-4.568)     | 4.355 (3.862-4.866)    | 4.198 (3.867-4.652)    | 0.563 | 4.364 (4.09-4.575)      | 3.938 (3.741-4.669)    | 4.236 (3.926-4.363)    | 4.252 (3.751-4.359)    | 0.483 | 0.378 |  |
| <i>Lactic acid</i>                | 75.808 (67.974-85.853) | 76.14 (72.71-89.479)   | 85.463 (74.452-95.224) | 75.406 (71.158-79.759) | 0.226 | 79.845 (73.389-102.516) | 77.012 (75.487-87.892) | 75.961 (72.358-88.192) | 77.382 (69.064-79.441) | 0.4   | 0.255 |  |
| <i>Leucine</i>                    | 7.4 (6.702-8.209)      | 7.387 (6.609-7.586)    | 7.18 (6.686-7.957)     | 7.124 (6.65-7.735)     | 0.919 | 6.999 (6.814-7.367)     | 6.524 (6.175-7.378)    | 7.022 (6.811-7.323)    | 7.044 (6.274-7.278)    | 0.664 | 0.901 |  |
| <i>Linoleic acid</i>              | 1.1 (0.504-1.703)      | 1.245 (0.686-1.628)    | 1.473 (0.975-2.1)      | 1.872 (1.269-2.806)    | 0.613 | 0.992 (0.767-2.113)     | 1.461 (1.248-1.808)    | 1.001 (0.927-1.129)    | 1.34 (1.091-1.709)     | 0.1   | 0.56  |  |
| <i>Malic acid</i>                 | 0.587 (0.371-1.025)    | 0.501 (0.341-0.698)    | 0.567 (0.518-0.683)    | 0.602 (0.447-0.744)    | 0.217 | 0.539 (0.469-0.761)     | 0.503 (0.42-0.615)     | 0.406 (0.377-0.449)++  | 0.397 (0.348-0.469)    | 0.274 | 0.084 |  |
| <i>Maltose</i>                    | 0.021 (0.016-0.041)    | 0.012 (0.008-0.014)€   | 0.008 (0.004-0.012)a   | 0.009 (0.005-0.011)    | 0.019 | 0.008 (0.007-0.012)+    | 0.009 (0.008-0.016)    | 0.009 (0.006-0.017)    | 0.008 (0.005-0.011)    | 0.232 | 0.009 |  |
| <i>Methionine</i>                 | 3.496 (3.236-3.67)     | 3.443 (3.259-3.609)    | 3.139 (3.102-3.435)    | 3.189 (3.112-3.381)    | 0.166 | 3.372 (3.194-3.42)      | 3.292 (3.183-3.411)    | 3.439 (3.314-3.531)    | 3.285 (3.236-3.482)    | 0.348 | 0.272 |  |
| <i>myo-Inositol</i>               | 1.13 (0.923-1.209)     | 1.074 (0.784-1.174)    | 0.928 (0.897-1.066)    | 0.801 (0.733-1.016)    | 0.106 | 0.947 (0.816-1.124)     | 1.02 (0.908-1.092)     | 0.888 (0.773-1.052)    | 0.908 (0.804-1.077)    | 0.397 | 0.182 |  |
| <i>Oleic acid</i>                 | 2.925 (1.2-4.668)      | 3.241 (1.188-4.486)    | 6.258 (4.026-10.184)   | 9.893 (5.664-13.354)   | 0.294 | 2.748 (2.071-4.622)     | 3.811 (2.815-6.342)    | 5.37 (5.074-5.81)      | 7.469 (5.014-10.02)    | 0.613 | 0.113 |  |
| <i>Ornithine</i>                  | 2.685 (1.693-4.077)    | 2.208 (1.932-3.595)    | 2.284 (2.17-4.112)     | 1.709 (1.562-2.286)    | 0.268 | 2.401 (1.835-2.526)     | 1.713 (1.459-2.04)     | 2.185 (2.092-3.13)     | 1.777 (1.377-2.055)    | 0.208 | 0.78  |  |
| <i>Oxalic acid</i>                | 24.293 (21.582-26.714) | 26.491 (25.029-27.684) | 24.139 (23.125-29.799) | 22.728 (20.231-23.998) | 0.099 | 26.4 (21.505-36.416)    | 27.622 (24.27-36.927)  | 27.249 (25.882-29.611) | 33.773 (29.3-37.54)    | 0.454 | 0.552 |  |

|                        |                           |                           |                           |                           |       |                           |                           |                           |                           |        |       |
|------------------------|---------------------------|---------------------------|---------------------------|---------------------------|-------|---------------------------|---------------------------|---------------------------|---------------------------|--------|-------|
| <i>Oxoproline</i>      | 145.749 (136.603-166.354) | 143.399 (132.564-167.096) | 155.083 (123.075-183.659) | 157.99 (142.17-165.27)    | 0.168 | 116.228 (105.816-175.582) | 139.734 (122.876-145.385) | 143.175 (111.038-179.911) | 142.736 (121.332-153.167) | 0.47   | 0.223 |
| <i>Palmitic acid</i>   | 98.779 (77.763-108.3)     | 96.293 (75.619-106.847)   | 90.963 (73.175-105.392)   | 103.06 (84.162-113.351)   | 0.997 | 97.334 (84.965-118.958)   | 105.446 (98.11-114.62)    | 87.764 (81.965-91.883)    | 102.34 (75.426-107.523)   | 0.075  | 0.149 |
| <i>Phenylalanine</i>   | 3.809 (3.607-4.009)       | 3.716 (3.456-3.877)       | 3.6 (3.516-4.176)         | 3.764 (3.616-3.831)       | 0.98  | 3.627 (3.538-3.706)       | 3.534 (3.428-3.698)       | 3.998 (3.873-4.051)aa     | 3.737 (3.589-3.909)€      | 0.001  | 0.076 |
| <i>Phosphoric acid</i> | 60.912 (57.252-67.868)    | 53.837 (51.97-57.999)€    | 50.315 (45.915-54.037)aa  | 49.091 (47.481-54.275)b   | 0.003 | 61.59 (59.219-70.695)     | 62.746 (60.781-67.589)    | 52.724 (47.416-56.343)    | 52.207 (49.76-56.746)     | 0.201  | 0.066 |
| <i>Pipecolic acid</i>  | 0.096 (0.075-0.106)       | 0.088 (0.068-0.096)       | 0.054 (0.048-0.064)       | 0.06 (0.053-0.067)        | 0.134 | 0.09 (0.077-0.1)          | 0.083 (0.076-0.09)        | 0.054 (0.047-0.067)a      | 0.061 (0.054-0.073)a      | 0.01   | 0.068 |
| <i>Proline</i>         | 26.014 (20.318-36.895)    | 26.863 (22.184-30.998)    | 45.239 (38.993-53.43)a    | 39.705 (35.115-40.687)caa | 0.044 | 20.031 (13.587-27.608)    | 20.039 (17.055-23.79)     | 36.726 (35.376-38.474)aax | 32.373 (29.917-35.205)€aa | 0.0001 | 0.027 |
| <i>Pyruvic acid</i>    | 24.766 (16.785-27.088)    | 19.627 (13.73-24.99)      | 27.456 (23.314-34.62)     | 29.068 (21.758-29.684)    | 0.082 | 19.781 (12.348-25.187)    | 21.118 (17.341-23.747)    | 26.343 (22.112-29.174)    | 19.131 (14.938-26.318)    | 0.838  | 0.269 |
| <i>Serine</i>          | 9.355 (8.106-10.327)      | 9.605 (8.806-10.24)       | 13.718 (12.835-14.986)    | 13.062 (10.964-13.225)    | 0.509 | 9.04 (8.871-9.834)        | 9.033 (8.48-9.496)        | 13.246 (12.441-14.116)    | 12.433 (10.829-13.6)      | 0.115  | 0.854 |
| <i>Succinic acid</i>   | 0.219 (0.185-0.321)       | 0.223 (0.194-0.243)       | 0.282 (0.268-0.292)b      | 0.224 (0.194-0.289)c      | 0.042 | 0.26 (0.218-0.29)         | 0.204 (0.179-0.257)       | 0.212 (0.184-0.243)++     | 0.24 (0.175-0.291)        | 0.454  | 0.055 |
| <i>Taurine</i>         | 1.196 (1.092-2.008)       | 1.688 (1.173-2.916)       | 1.794 (1.373-2.587)       | 1.23 (1.041-1.535)        | 0.596 | 2.005 (0.923-4.912)       | 1.373 (1-2.538)           | 1.966 (1.695-2.372)       | 2.023 (1.636-2.278)       | 0.502  | 0.851 |
| <i>Threonic acid</i>   | 0.443 (0.391-0.569)       | 0.466 (0.412-0.621)       | 0.701 (0.629-0.803)a      | 0.676 (0.622-0.737)aa     | 0.012 | 0.516 (0.39-0.791)        | 0.463 (0.422-0.494)       | 0.683 (0.636-0.775)       | 0.672 (0.632-0.74)        | 0.061  | 0.07  |
| <i>Threonine</i>       | 6.486 (6.054-7.463)       | 6.719 (6.138-7.427)       | 7.405 (7.065-8.515)       | 7.307 (6.639-7.902)       | 0.24  | 6.716 (6.066-7.299)       | 6.529 (6.201-7.063)       | 7.87 (7.506-8.348)aa      | 7.826 (7.189-8.6)a        | 0.031  | 0.012 |
| <i>Uric acid</i>       | 0.385 (0.353-0.423)       | 0.385 (0.345-0.423)       | 0.461 (0.411-0.505)       | 0.378 (0.355-0.464)       | 0.053 | 0.373 (0.305-0.437)       | 0.301 (0.273-0.533)       | 0.46 (0.432-0.522)        | 0.506 (0.476-0.665)       | 0.67   | 0.081 |
| <i>Valine</i>          | 9.059 (8.376-10.22)       | 9.021 (8.137-9.48)        | 8.642 (7.902-9.741)       | 8.199 (7.647-8.887)       | 0.104 | 8.785 (8.143-9.291)       | 8.002 (7.697-9.028)       | 8.412 (8.152-8.577)       | 8.391 (7.495-8.672)       | 0.272  | 0.207 |
| <i>Xylonic acid</i>    | 0.007 (0.006-0.008)       | 0.007 (0.006-0.012)       | 0.008 (0.007-0.013)       | 0.007 (0.005-0.008)       | 0.473 | 0.007 (0.007-0.012)       | 0.006 (0.005-0.008)       | 0.008 (0.007-0.01)        | 0.007 (0.006-0.008)       | 0.123  | 0.44  |

Data shown as Median (Interquartile Range) (IQR) in Arbitrary units. P-VALUE for L18 groups, L16 groups and STD vs CAF comparison was calculated by Kruskal-Wallis' test; a indicates significant differences between STD vs CAF; € indicates significant differences between VH vs GSPE; + indicates significant differences between L6-VH vs L18-VH groups by Mann-Whitney (a, € and + p ≤ 0.05; aa and ++ p ≤ 0.01). b Indicates tendency between STD vs CAF, c indicates tendency between VH vs GSPE conditions; x Indicates tendency between L6-VH vs L18-VH by Mann-Whitney (p =0.1-0.051).
